## Photo Quiz

# Generalized Serpiginous Eruption during Immunosuppressive Treatment for Leprosy Reactive Neuritis

Carlos Gustavo Wambier<sup>1,2\*</sup>, Fernanda Britta Maitto Lemos<sup>1</sup>, Mark Aaron Cappel<sup>3</sup>, Fernando Bellissimo-Rodrigues<sup>4</sup>, Norma Tiraboschi Foss<sup>1</sup>

**1** Division of Dermatology, Department of Internal Medicine, Faculty of Medicine of Ribeirao Preto, University of Sao Paulo, Ribeirao Preto, Brazil, **2** Faculty of Medicine, University of Ribeirao Preto, Ribeirao Preto, Brazil, **3** Department of Dermatology, Mayo Clinic Florida, Jacksonville, Florida, United States of America, **4** Department of Social Medicine, Faculty of Medicine of Ribeirao Preto, University of Sao Paulo, Ribeirao Preto, Brazil

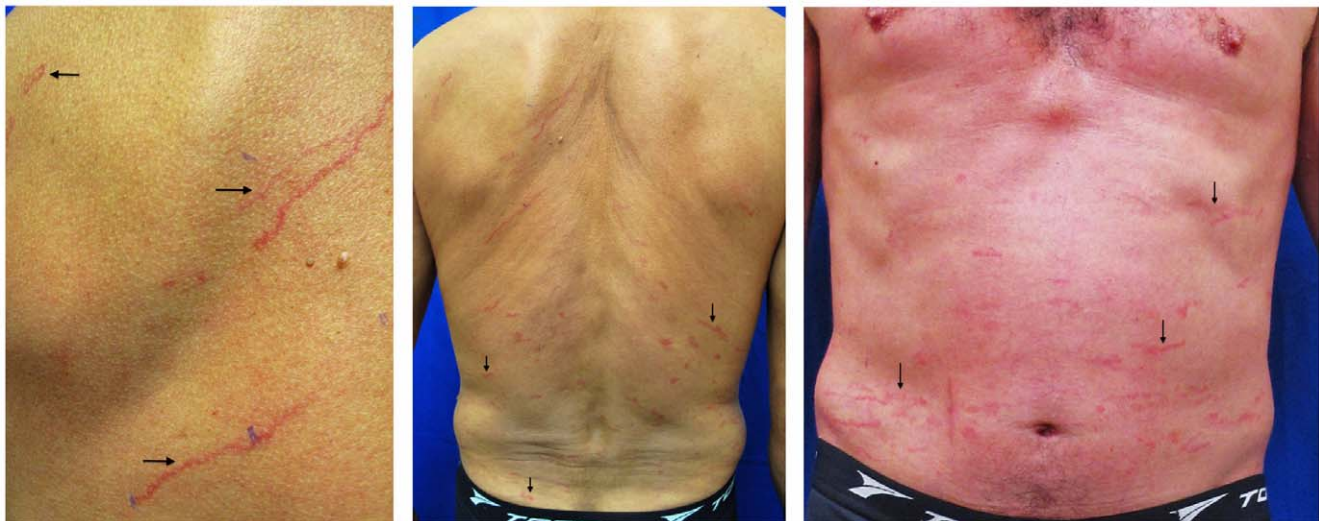

**Figure 1. Multiple linear urticarial wheals that expanded serpiginously at approximately 1 cm/15 min, resulting in various tracks in the back and abdomen.**

doi:10.1371/journal.pntd.0001357.g001

## Case Presentation

A 49-year-old male farmer with previous diagnosis and treatment of borderline lepromatous leprosy presented with a pruritic cutaneous eruption, demonstrated in Figure 1. This occurred while being treated with prednisone 60 mg (.8 mg/kg) and azathioprine 50 mg per day for leprosy reactive ulnar neuritis. He had noted worsening of the pruritus over the preceding month. He did not have any symptoms of cough, dyspnea, fever, or diarrhea.

Over the past 6 months he had been prescribed various dosages of azathioprine 50–100 mg and prednisone 10–60 mg per day to control relapsing reactive neuritis. His complete blood count revealed frequent eosinophilia and he had negative tests for HIV, hepatitis B and C, and syphilis. He did not have diabetes mellitus.

## Diagnosis

**Disseminated larva currens.** *Follow-up and treatment:* Stool parasitology examination revealed *Strongyloides stercoralis* larvae on all three samples. Due to the clinical diagnosis of disseminated larva currens, he was prescribed ivermectin 15 mg for 2 consecutive days (200 µg/kg/day). The prednisone dose was tapered to 20 mg per day. The pruritus resolved and the creeping eruption disappeared in few days after treatment (Figure 2), with no clinical or parasitological recurrence at a 12-month follow-up.

Histopathology of a 4-mm punch biopsy from a lesion on the patient's left shoulder demonstrated a mild mid-dermal perivascular lymphocytic inflammatory infiltrate with rare eosinophils, but no larvae were identified in the sections examined.

## Discussion

This case illustrates the exuberant cutaneous manifestations of larva currens and highlights the importance of primary and

**Citation:** Wambier CG, Lemos FBM, Cappel MA, Bellissimo-Rodrigues F, Foss NT (2011) Generalized Serpiginous Eruption during Immunosuppressive Treatment for Leprosy Reactive Neuritis. *PLoS Negl Trop Dis* 5(12): e1357. doi:10.1371/journal.pntd.0001357

**Editor:** Carlos Franco-Paredes, Emory University, United States of America

**Published:** December 27, 2011

**Copyright:** © 2011 Wambier et al. This is an open-access article distributed under the terms of the Creative Commons Attribution License, which permits unrestricted use, distribution, and reproduction in any medium, provided the original author and source are credited.

**Funding:** The authors received no funding for this work.

**Competing Interests:** The authors have declared that no competing interests exist.

\* E-mail: cwambier@usp.br

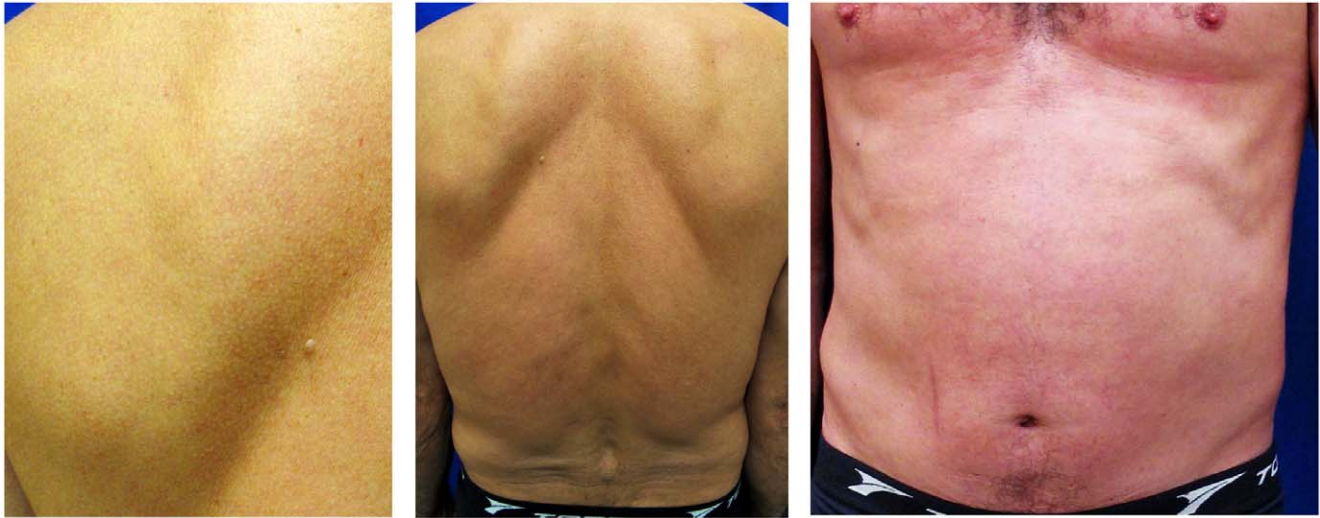

**Figure 2. Complete remission after 1 week of treatment.** No lesions on the back and abdomen.  
doi:10.1371/journal.pntd.0001357.g002

secondary prophylaxis of disseminated strongyloidiasis in endemic areas during immunosuppressive treatment such as that used for organ transplantation, oncologic chemotherapy, immunologic diseases, and leprosy reactions. Recently, the initiation of anti-TNF therapy was associated with the exacerbation of the *S. stercoralis* infection in one rheumatologic patient [1]. Although *S. stercoralis* generally causes asymptomatic infection, in the immunocompromised host the number of parasites can increase, leading to autoinfection [2], dissemination, hyperinfection, and death if unrecognized [3].

These chronic recurrent serpiginous eruptions are manifestations of autoinfection by filariform larvae, which are capable of reinfesting the host by penetrating the intestinal wall or by transcutaneous entry points [2], such as the perianal and gluteal area. After reinfestation, they disseminate to other organs, including the skin. The autoinfective cycle occurs at a low level throughout infection [2], making larva currens a common, but occasional, phenomenon of few or solitary tracks. However, in an immunocompromised host an accelerated autoinfective cycle may ensue, resulting in generalized pruritic eruption (disseminated larva currens), with multiple and frequent serpiginous tracks [4]. The distinction between autoinfection and hyperinfection is quantitative (parasitological load) and is not strictly defined [2]. Hyperinfection triggers a severe, life-threatening syndrome known as hyperinfection syndrome or “disseminated strongyloidiasis”, which usually presents cutaneous manifestations of vascular injury, such as petechial or purpuric macules [2]. A distinctive sign in hyperinfection syndrome is a periumbilical purpuric macule, known as “the thumbprint sign” [5,6]. Initial transcutaneous *S. stercoralis* infection may also present acute cutaneous reactions at the site of larval entry, such as lower and upper extremities.

## References

- Boatright MD, Wang BW (2005) Clinical infection with *Strongyloides stercoralis* following etanercept use for rheumatoid arthritis. *Arthritis Rheum* 52: 1336–1337.
- Keiser P, Nutman T (2004) *Strongyloides stercoralis* in the immunocompromised population. *Clin Microbiol Rev* 17: 208–217.
- Ramanathan R, Nutman T (2008) *Strongyloides stercoralis* infection in the immunocompromised host. *Curr Infect Dis Rep* 10: 105–110.
- Karthikeyan K, Thappa D (2002) Disseminated cutaneous larva migrans. *Indian J Dermatol* 47: 249–250.
- Bank DE, Grossman ME, Kohn SR, Rabinowitz AD (1990) The thumbprint sign: rapid diagnosis of disseminated strongyloidiasis. *J Am Acad Dermatol* 23: 324–326.
- Salluh JI, Bozza FA, Pinto TS, Toscano L, Weller PF, et al. (2005) Cutaneous periumbilical purpura in disseminated strongyloidiasis in cancer patients: a pathognomonic feature of potentially lethal disease? *Braz J Infect Dis* 9: 419–424.
- Galimberti R, Pontón A, Zaputovich FA, Velasquez L, Galimberti G, et al. (2009) Disseminated strongyloidiasis in immunocompromised patients – report of three cases. *Int J Dermatol* 48: 975–978.

## Key Learning Points

- Presentation of disseminated larva currens as multiple pruriginous erythematous serpiginous wheals
- Therapeutic immunosuppression is the trigger factor for dissemination in a patient with *S. stercoralis* infestation
- Hyperinfection syndrome and death are possible complications of untreated cases;
- Effective treatment is possible with ivermectin 200 µg/kg/day for 2 days
- Differential diagnosis: cutaneous larva migrans and dermatographism—both can be ruled out by detection of movement within minutes by pen markings on the extremities of the tracks on physical examination

Physicians should be able to make a presumptive clinical diagnosis of larva currens based on the observation of rapidly moving linear or serpiginous tracks. Differential diagnoses include dermatographism and cutaneous larva migrans. The authors use pen markings on the extremities of these tracks to easily detect movement, as illustrated in Figure 1. Skin biopsies frequently fail to reveal the rapidly moving *S. stercoralis* [7].

## Acknowledgments

The authors gratefully acknowledge the able assistance of Flávia da Graça, MD, and Roberto Bueno Filho, MD, Division of Dermatology, Hospital of Clinics, Faculty of Medicine of Ribeirão Preto, University of São Paulo.

The patient authorized publication of data and photographs; he agreed with and signed the Portuguese version of PLoS consent form.
